# Supplementary material for: Bioactive Compounds from Endophytic Bacteria Bacillus subtilis Strain EP1 with Their Antibacterial Activities
Source: MDPI journal article supplement (doi:10.3390/metabo12121228), 2022-12-07
Supplement: s1 [file s1]

## Bioactive Compounds from Endophytic Bacteria *Bacillus subtilis* strain EP1 with their Antibacterial Activities

Muhammad Numan <sup>1,2</sup>, Muddaser Shah <sup>1,3</sup>, Sajjad Asaf <sup>1</sup>, Najeeb Ur Rehman <sup>1,\*</sup> and Ahmed Al-Harrasi <sup>1,\*</sup>

<sup>1</sup> Natural & Medical Sciences Research Center, University of Nizwa, Nizwa 616, Oman; [sajjadasaf@unizwa.edu.om](mailto:sajjadasaf@unizwa.edu.om) (S.A.)

<sup>2</sup> Department of Biology, University of North Carolina at Greensboro, NC 27412, USA; [numanbiotech@gmail.com](mailto:numanbiotech@gmail.com) (M.N)

<sup>3</sup> Department of Botany, Abdul Wali Khan University Mardan, Mardan 23200, Pakistan; [muddasershah@awakum.edu.pk](mailto:muddasershah@awakum.edu.pk) (M.S.)

\*Correspondence: [najeeb@unizwa.edu.om](mailto:najeeb@unizwa.edu.om) (N.U.R); [aharrasi@unizwa.edu.om](mailto:aharrasi@unizwa.edu.om) (A.A.-H)

**Abstract:** Endophytic bacteria boost host plant defense and growth by producing vital compounds. In the current study, a bacterial strain was isolated from the *Boswellia sacra* plant and identified as *Bacillus subtilis* strain EP1 (accession number: MT256301) through 16S RNA gene sequencing. From the identified bacteria, four compounds; **1** (4-(4-cinnamoyloxy)phenyl)butanoic acid), **2** (cyclo-(L-Pro-D-Tyr)), **3** (cyclo-(L-Val-L-Phe)), and **4** (cyclo-(L-Pro-L-Val)) were isolated and characterized by 1D and 2D NMR and mass spectroscopy. Moreover, antibacterial activity and beta-lactam-producing gene inhibition [(δ-(l-α-amino adipyl)-l-cysteinyl-d-valine synthetase (ACVS) and amino adipate aminotransferase (AADAT)] assays were performed. Significant antibacterial activity was observed against the human pathogenic bacterial strains (*E. coli*) by compound **4** with 13 ± 0.7 mm zone of inhibition (ZOI) followed by compound **1** having 11 ± 0.7 mm ZOI. In contrast, the least antibacterial activity among the tested samples was offered by compound **2** with 10 ± 0.9 mm ZOI compared to the standard (26 ± 1.2 mm). Similarly, the molecular analysis of beta-lactam inhibition determined that compounds **3** and **4** have inhibited the two genes (2 to 4-fold) in the beta-lactam biosynthesis (ACVS and AADAT) pathway. From these results, it can be concluded that future research on these compounds could lead to the inhibition of antibiotic-resistant pathogenic bacterial strains.

**Citation:** Lastname, F.; Lastname, F.; Lastname, F. Title. *Metabolites* **2022**, *12*, x. <https://doi.org/10.3390/xxxxx>

Academic Editor: Firstname Lastname

Received: date

Accepted: date

Published: date

**Publisher's Note:** MDPI stays neutral with regard to jurisdictional claims in published maps and institutional affiliations.

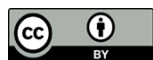

**Copyright:** © 2022 by the authors.

Submitted for possible open access

publication under the terms and

conditions of the Creative Commons

Attribution (CC BY) license

(<https://creativecommons.org/licenses/by/4.0/>).

**Keywords:** Secondary metabolites; *Bacillus subtilis* strain EP1; antibacterial activity; NMR spectroscopy; HR-ESI-MS.

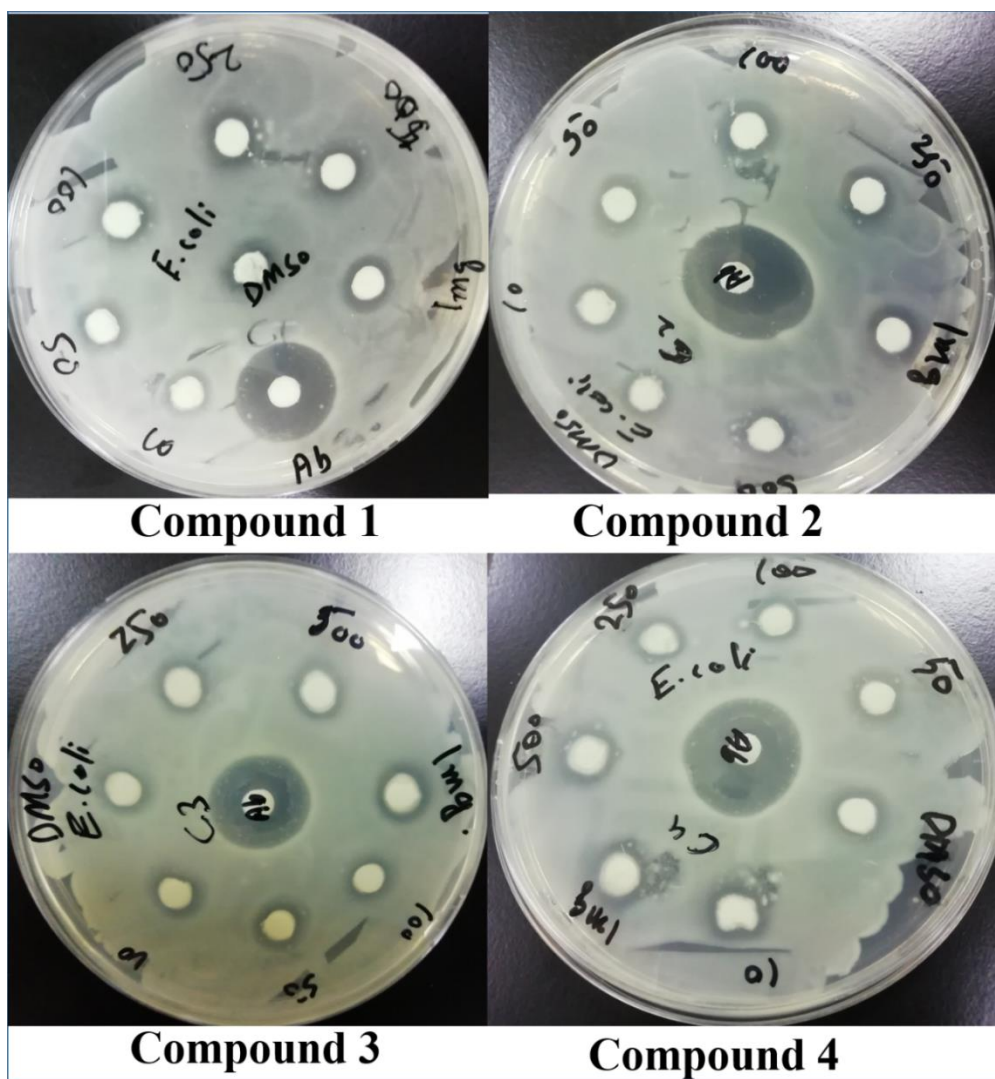

**Figure S1.** Antibacterial activity of the isolated compounds measured as disc diffusion.

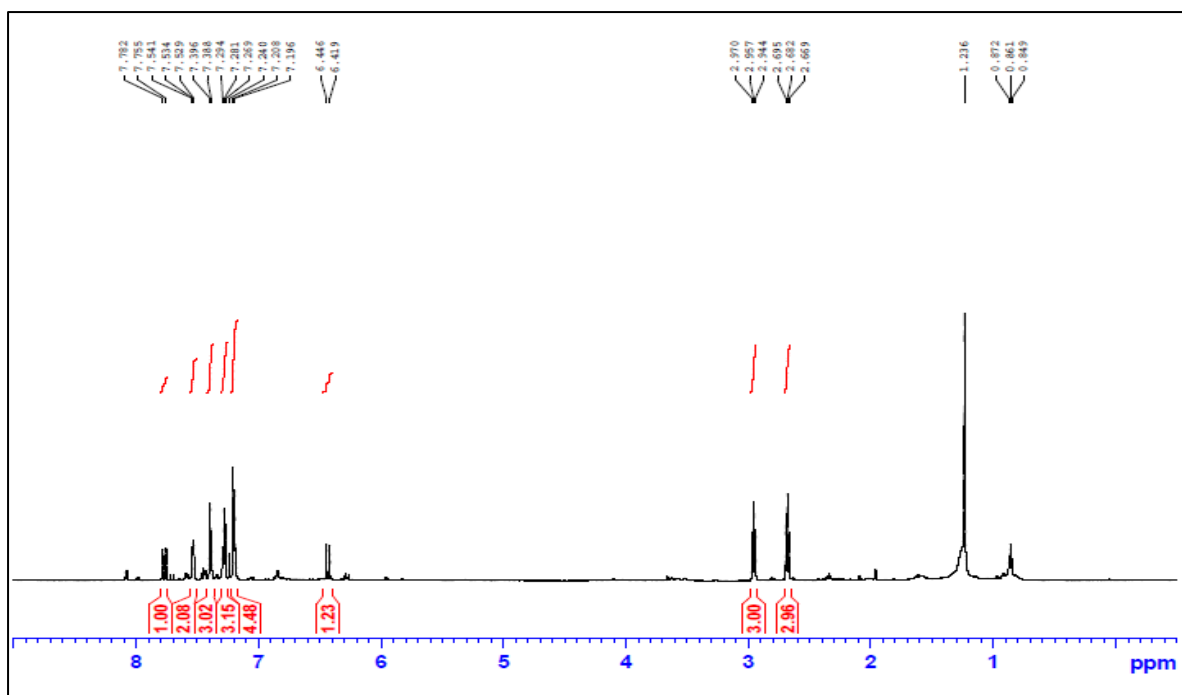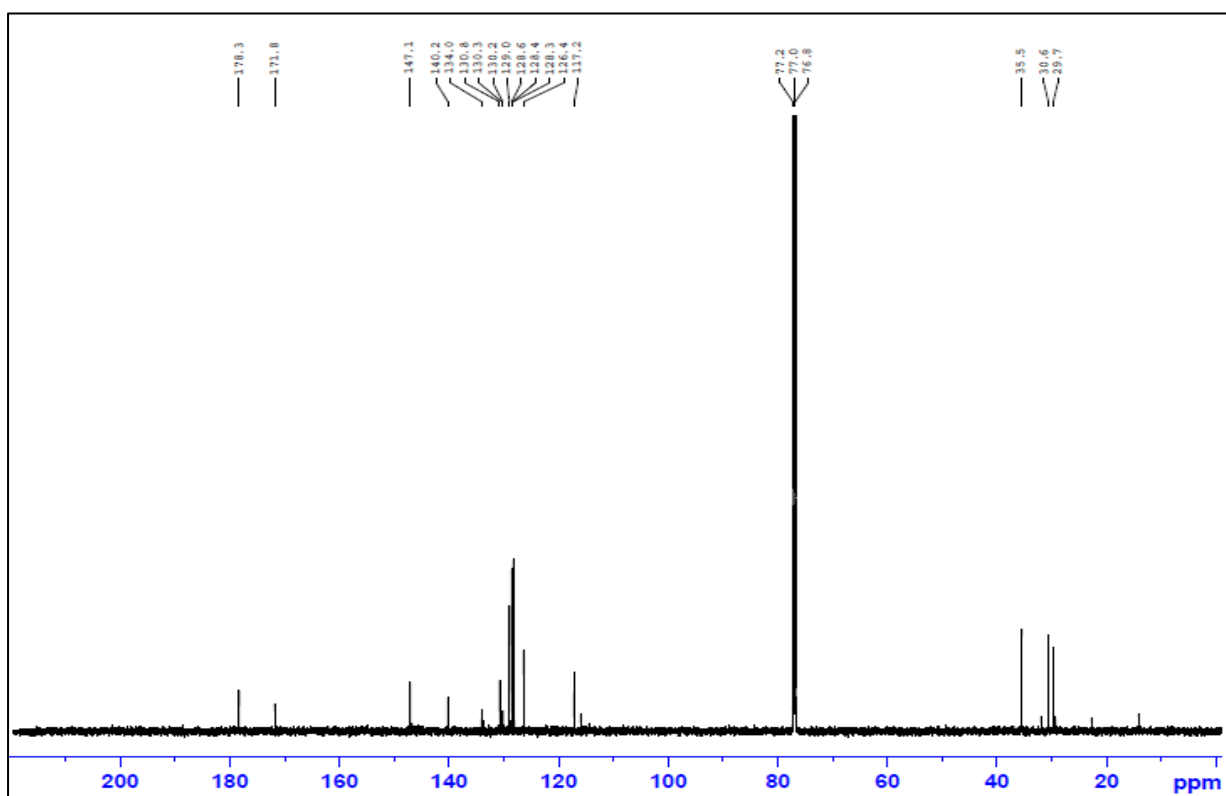

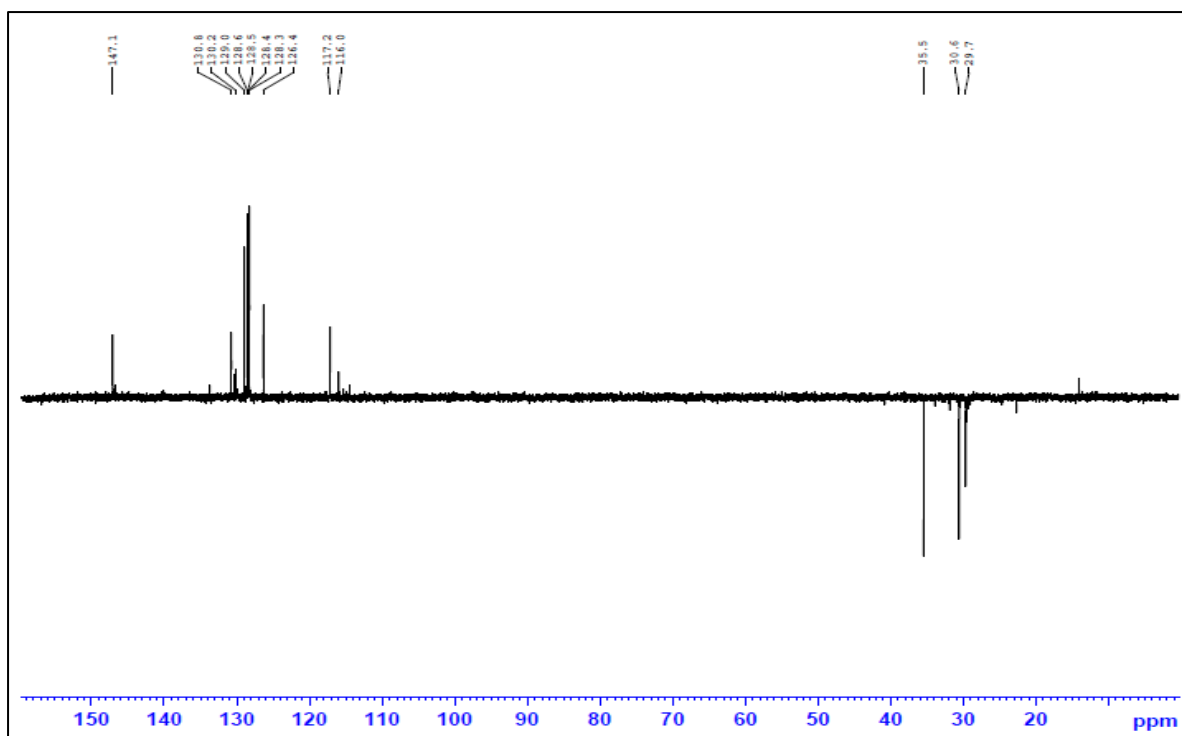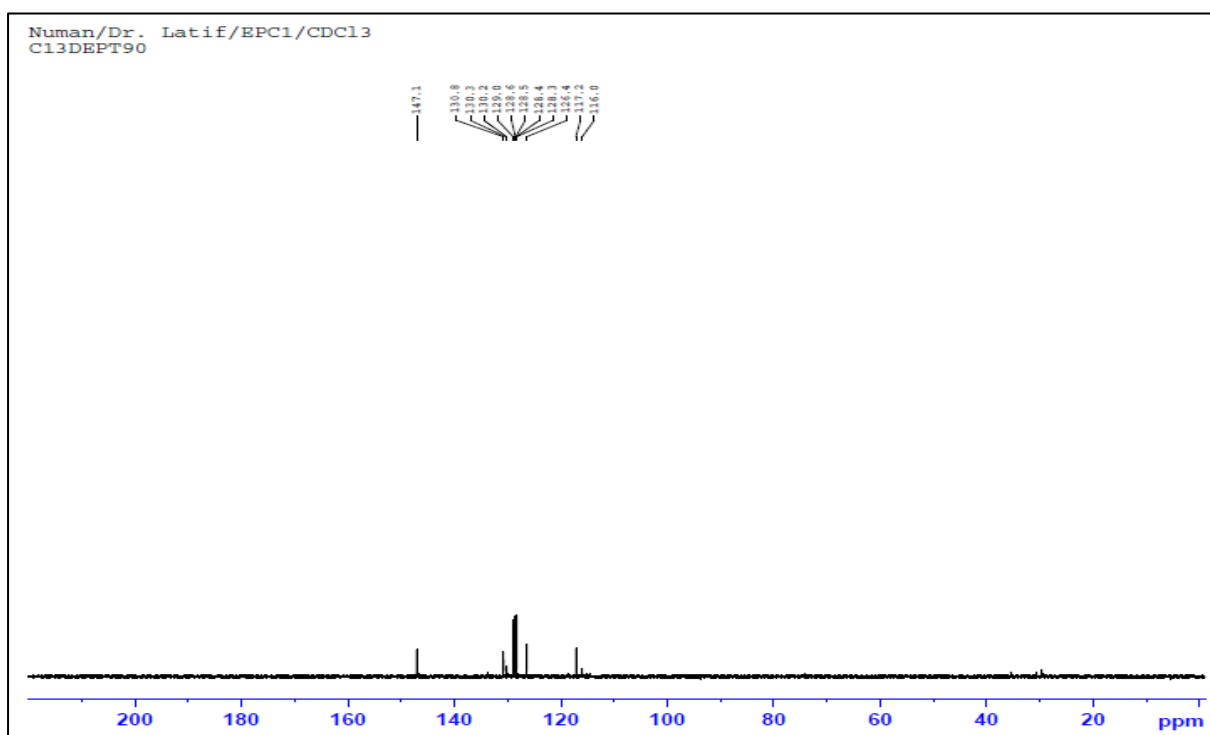

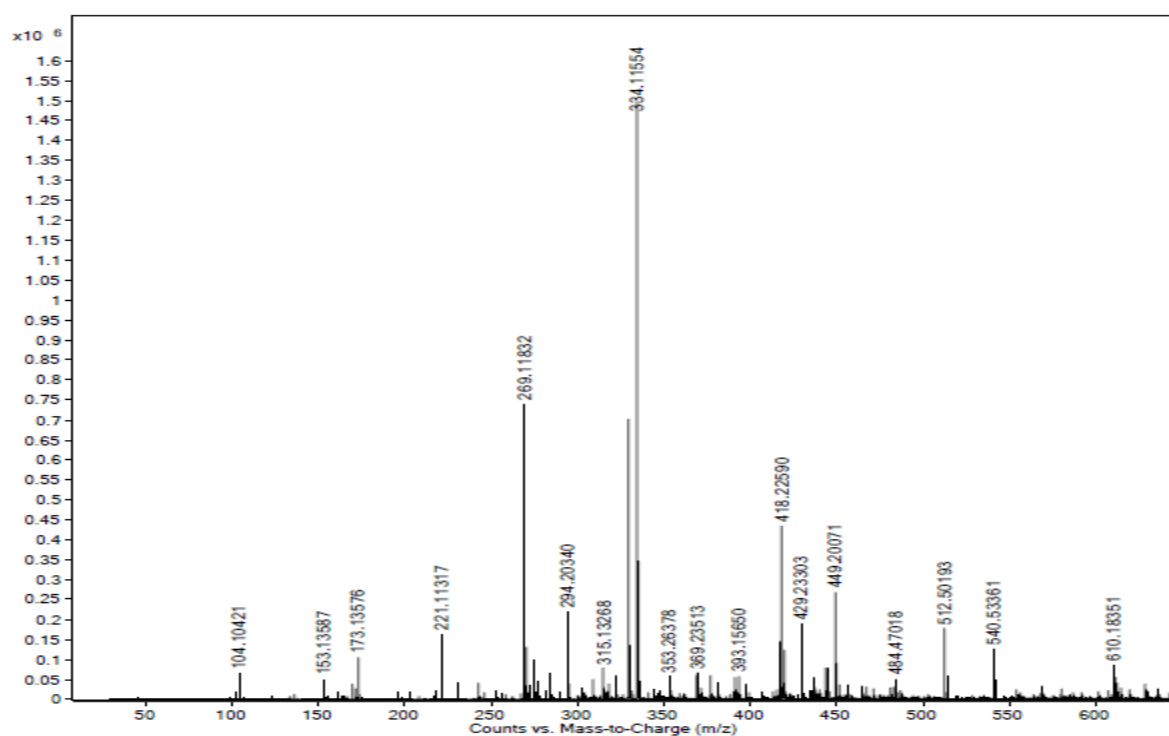

Figure S2:  $^1\text{H}$ -,  $^{13}\text{C}$ -NMR and HR-ESI-MS spectrum of 1

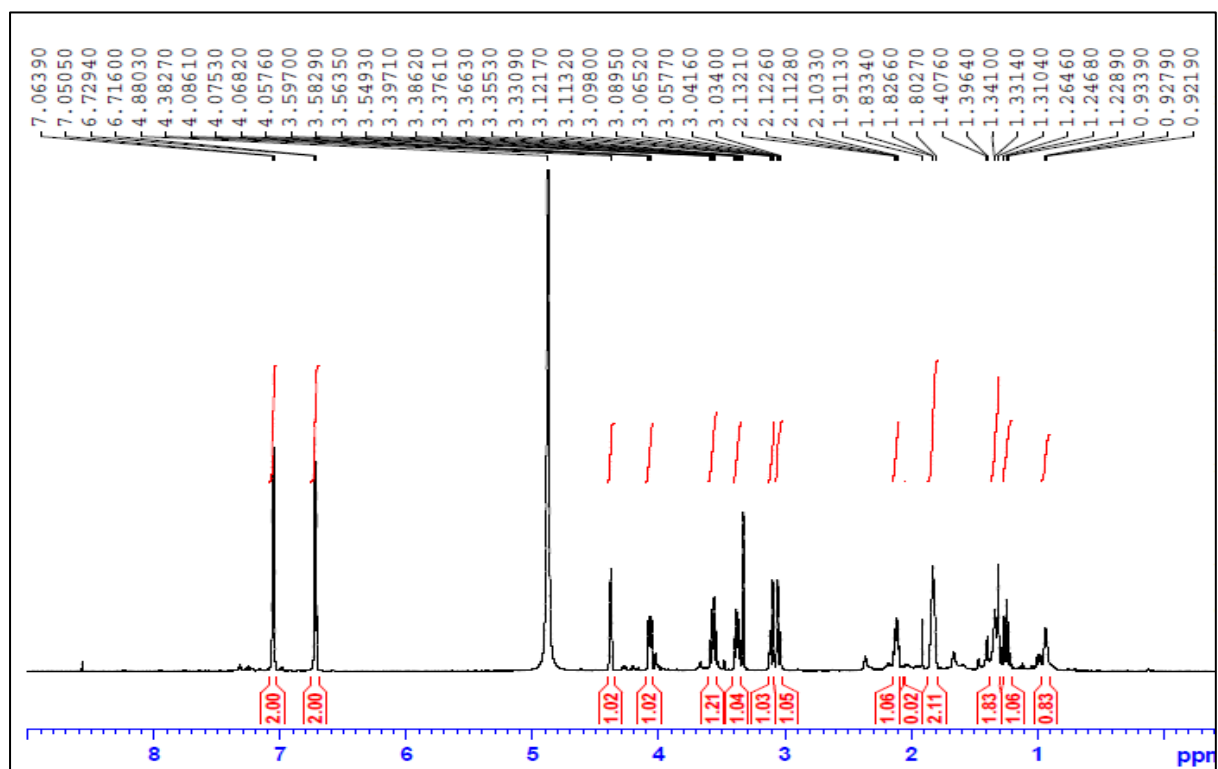

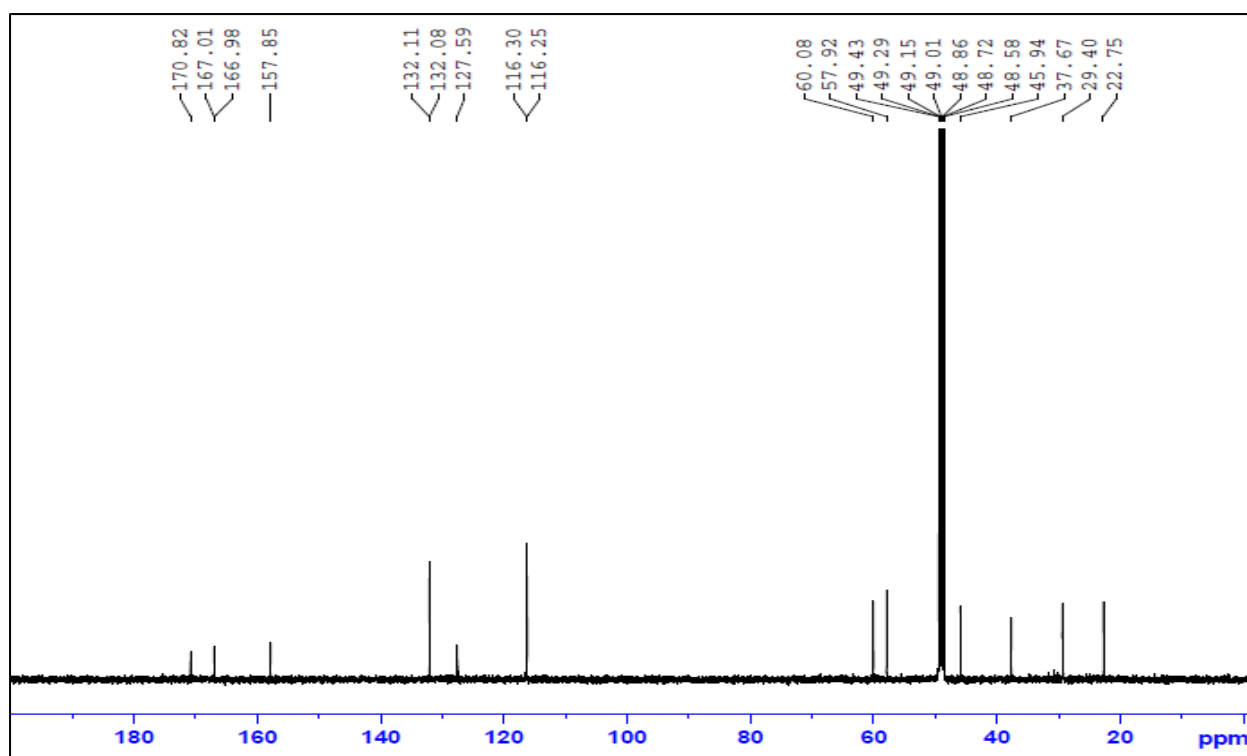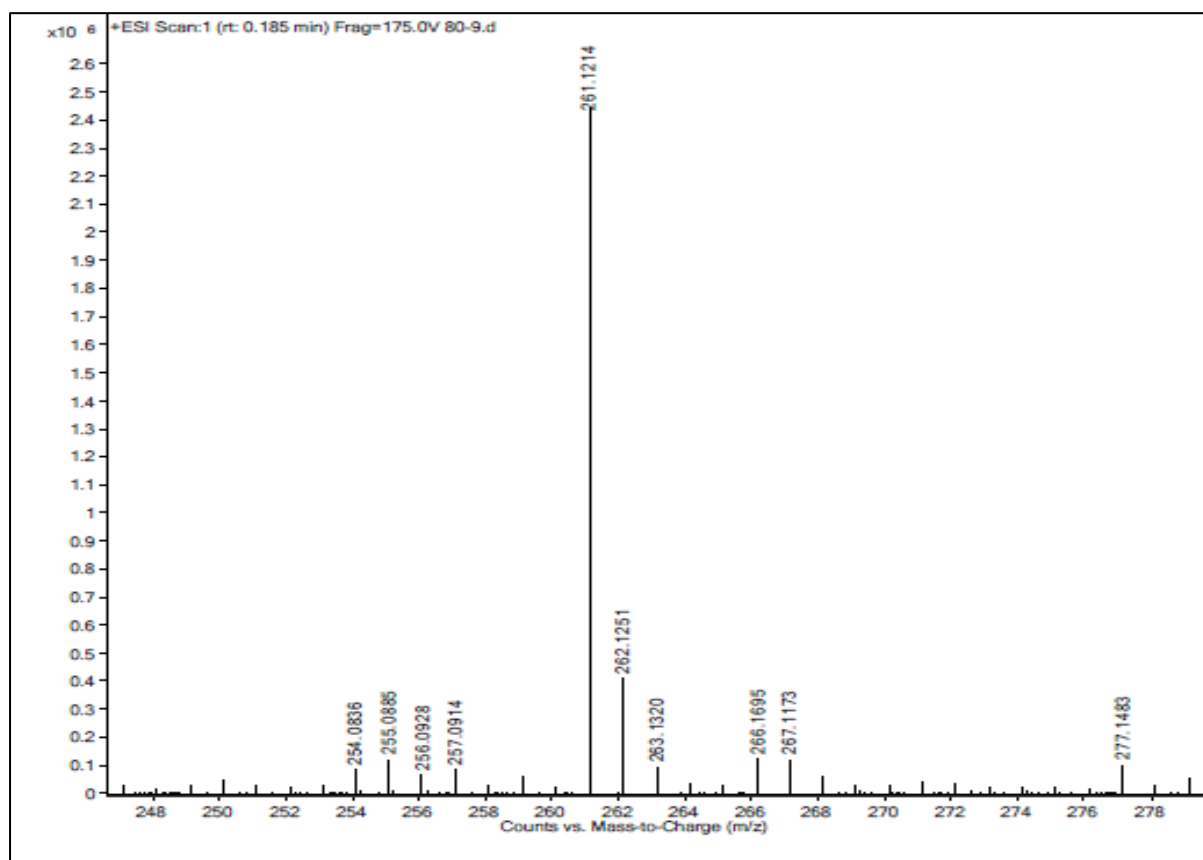

**Figure S3:** <sup>1</sup>H-, <sup>13</sup>C-NMR and HR-ESI-MS spectrum of **2**

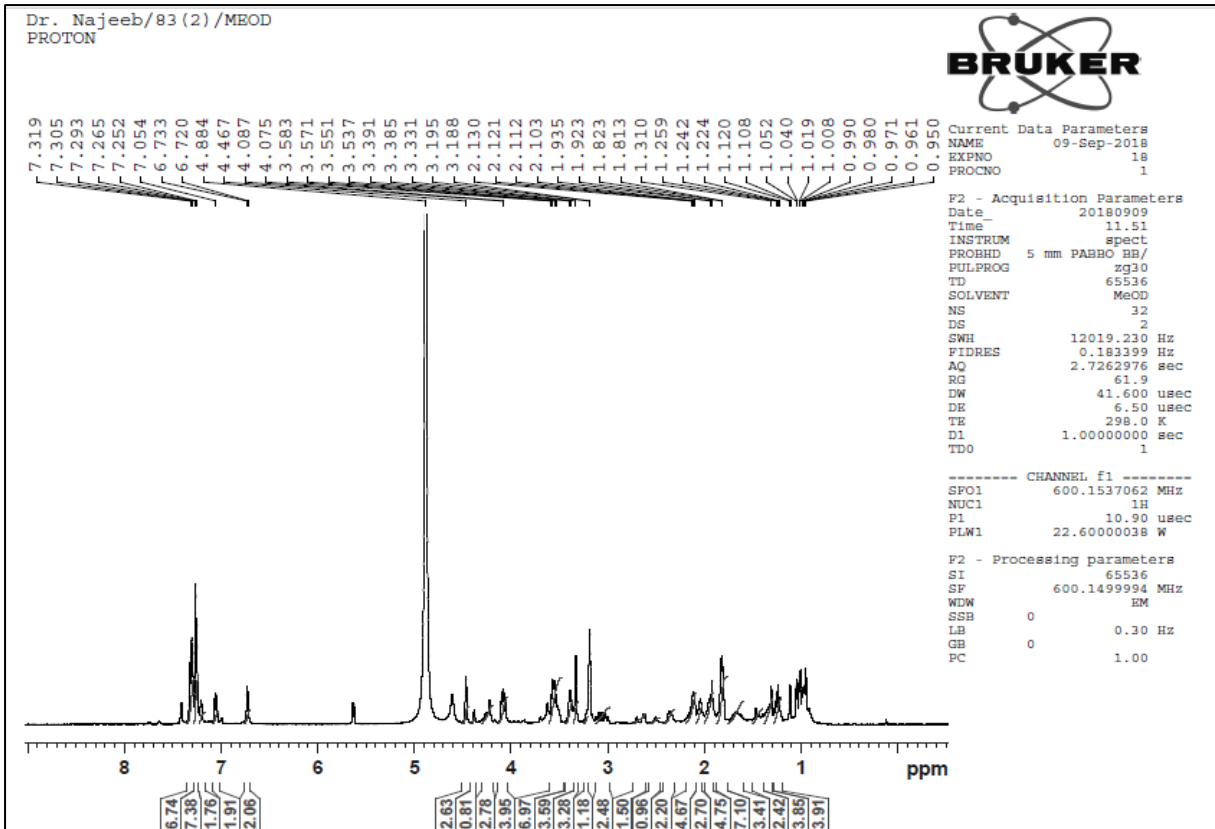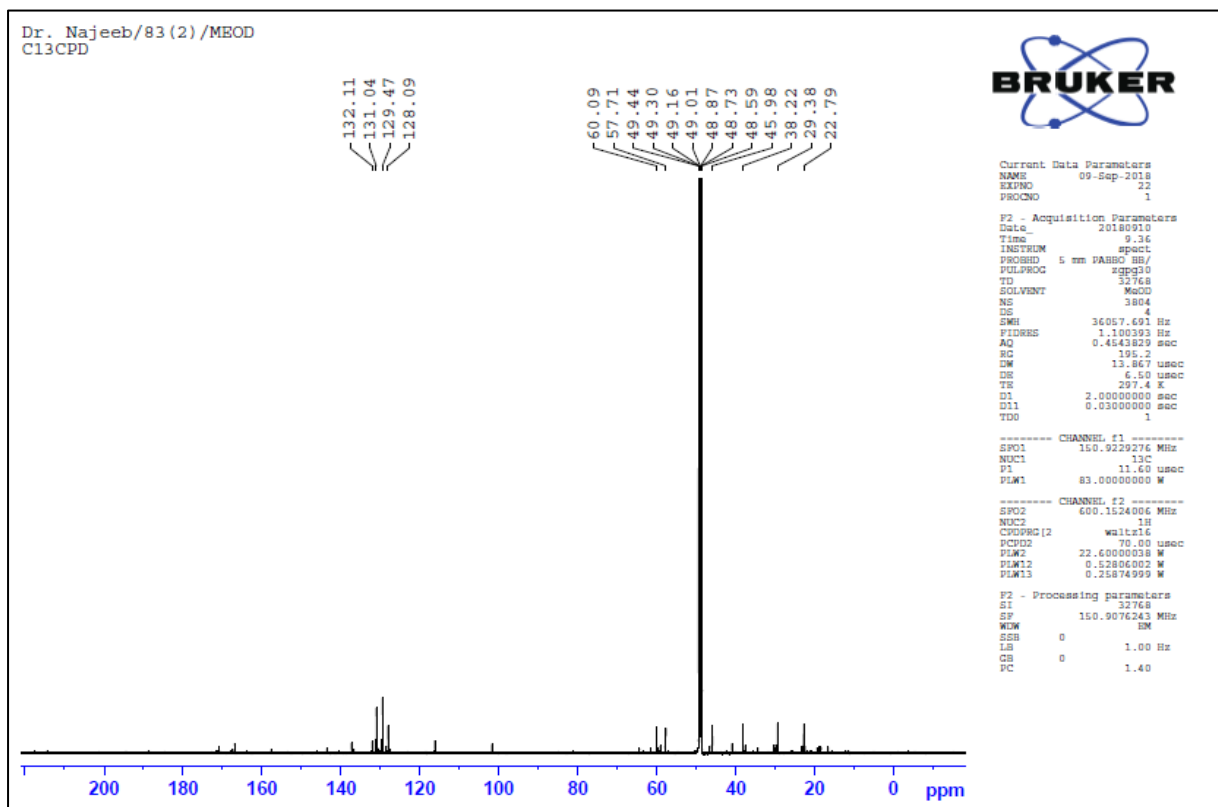

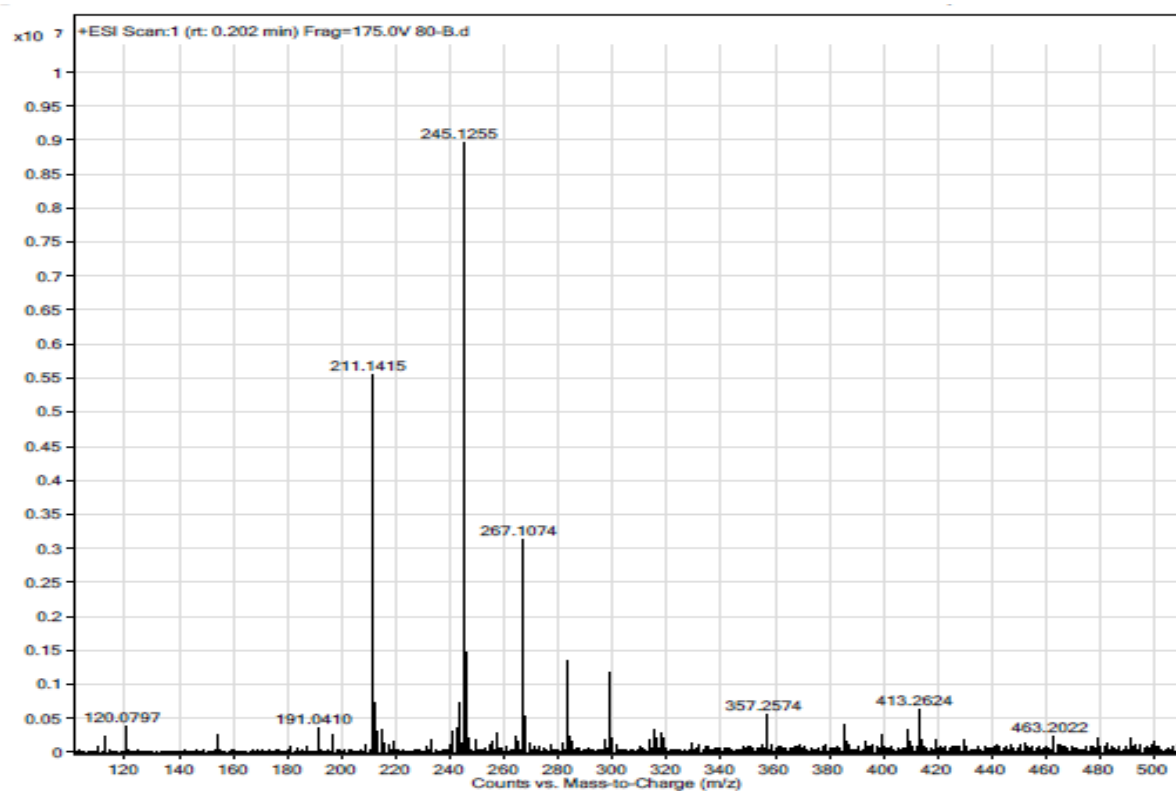

**Figure S4:**  $^1\text{H}$ -,  $^{13}\text{C}$ -NMR and HR-ESI-MS spectrum of **3**

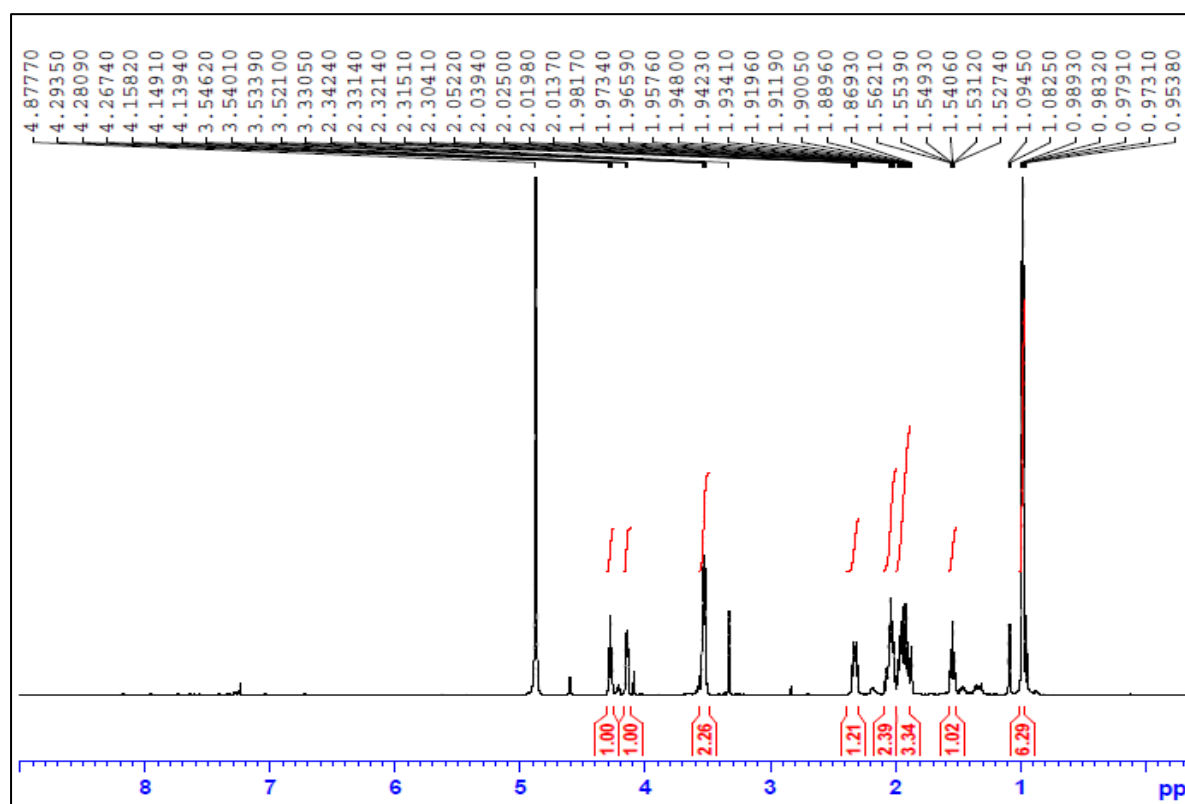



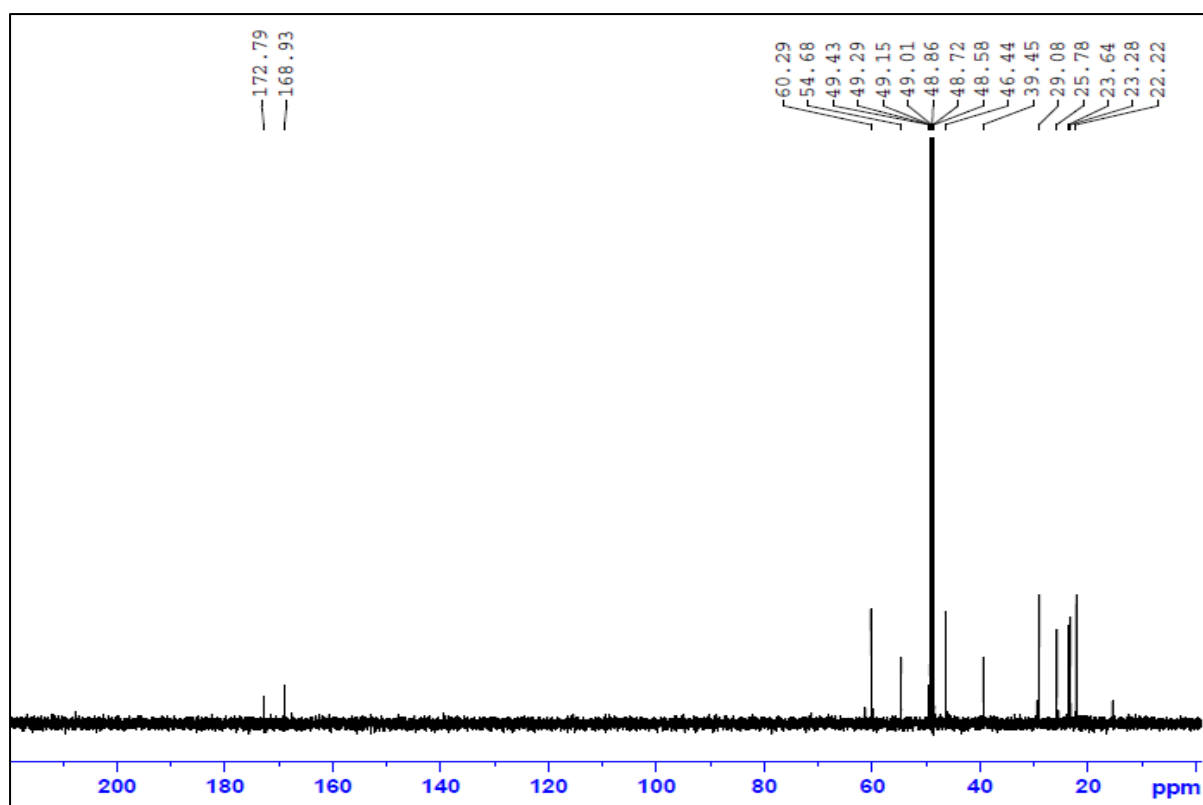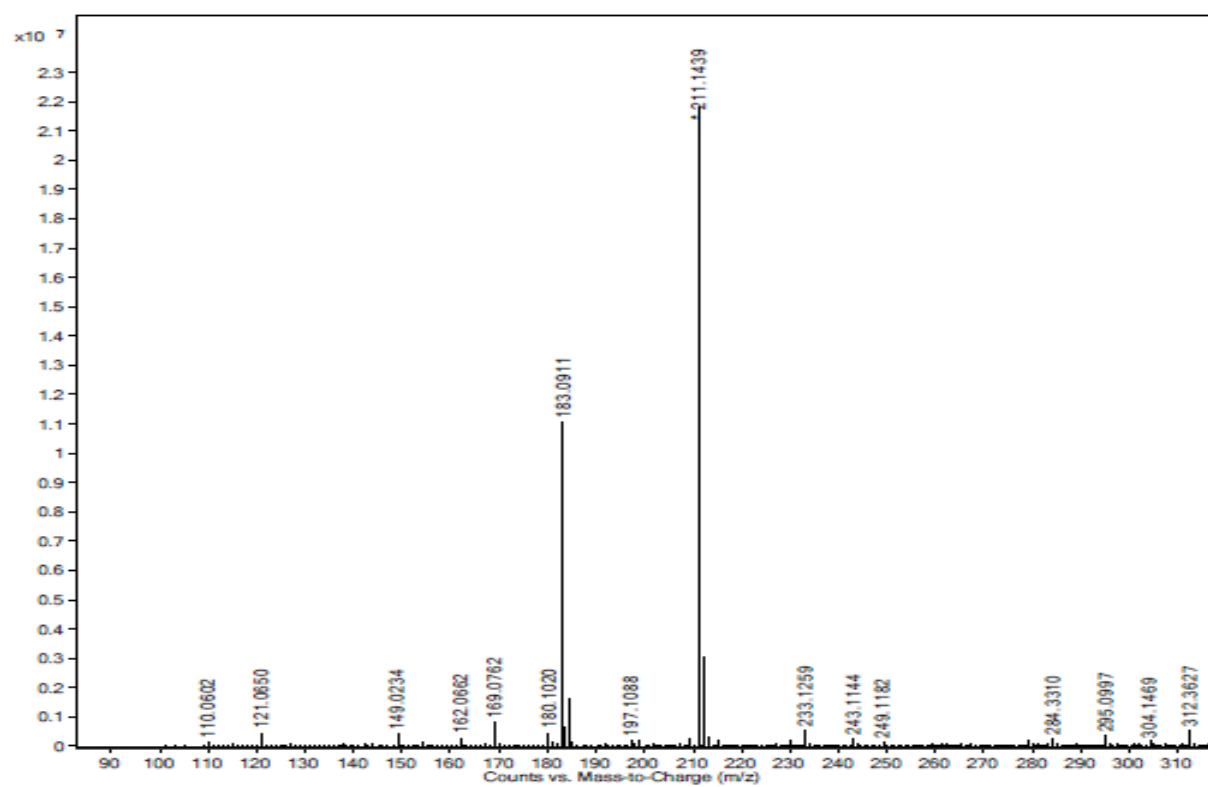

**Figure S5:** <sup>1</sup>H-, <sup>13</sup>C-NMR and HR-ESI-MS spectrum of **4**
